# Supplementary material for: Understanding Metabolic Alterations in Cancer Cachexia through the Lens of Exercise Physiology
Source: MDPI journal article supplement (doi:10.3390/cells11152317), 2022-07-27
Supplement: s1 [file s1]

## Supplementary materials

for “Understanding metabolic alterations in cancer cachexia through the lens of exercise physiology” by Irina Kareva

### *Model description*

The proposed phenomenological model describes the following mechanisms. Effort is introduced extrinsically corresponding to the exercise protocol described in (1), where measurements were recorded after participants warmed up for 15 minutes at an intensity below 100 W. After the warm-up period, participants exercised on a stationary bike, with exercise intensity increasing by 35 W every 10 minutes, until volitional exhaustion. To simulate this level of intensity, Effort is put into the model starting at 100 W at 15 minutes, increasing incrementally to match the reported exercise protocol.

The variables VO<sub>2</sub> and VCO<sub>2</sub> are described as follows. We assume that when Effort is below threshold VT<sub>1</sub>, VO<sub>2</sub> increases at a rate c<sub>1</sub>. This is described phenomenologically using the term  $c_1 \frac{(\text{Effort} - \text{VT}_1)^-}{\text{Effort} - \text{VT}_1}$ , where notation (Effort-VT<sub>1</sub>)<sup>-</sup> is positive when Effort < VT<sub>1</sub> and is zero otherwise. Similarly, when Effort is below VT<sub>1</sub>, VCO<sub>2</sub> increases at a rate c<sub>5</sub>. When Effort is greater than VT<sub>1</sub> but below VT<sub>2</sub>, we assume that VO<sub>2</sub> increases at a rate c<sub>2</sub>, which is described using the term  $\frac{(\text{Effort} - \text{VT}_1)^+}{\text{Effort} - \text{VT}_1} \frac{(\text{Effort} - \text{VT}_2)^-}{\text{Effort} - \text{VT}_2}$ . Here the term is positive when Effort > VT<sub>1</sub> and when Effort is < VT<sub>2</sub>, and is zero otherwise. Similarly, VCO<sub>2</sub> increases at a rate c<sub>6</sub>. When Effort is greater than VT<sub>2</sub> but below VO<sub>2</sub>max, we assume VO<sub>2</sub> increases at a rate c<sub>3</sub>, and VCO<sub>2</sub> increases at a rate c<sub>7</sub>. Finally, when Effort is greater than VO<sub>2</sub>max, we assume that VO<sub>2</sub> decreases at a rate c<sub>4</sub> and VCO<sub>2</sub> decreases at a rate c<sub>8</sub>. Additionally, we introduce parameter kvo<sub>2</sub> to describe any potential escape in VO<sub>2</sub> and kvco<sub>2</sub> to describe any potential escape of VCO<sub>2</sub>; these parameters may be helpful to phenomenologically allow for the system to return to baseline after Effort is stopped.

The resulting phenomenological system of equations is given below:

$$\begin{aligned} \text{VO}_2(t)' &= c_1 \frac{(\text{Effort} - \text{VT}_1)^-}{\text{Effort} - \text{VT}_1} + c_2 \frac{(\text{Effort} - \text{VT}_1)^+}{\text{Effort} - \text{VT}_1} \frac{(\text{Effort} - \text{VT}_2)^-}{\text{Effort} - \text{VT}_2} \\ &\quad + c_3 \frac{(\text{Effort} - \text{VT}_2)^+}{\text{Effort} - \text{VT}_2} \frac{(\text{Effort} - \text{VO}_{2\text{max}})^-}{\text{Effort} - \text{VO}_{2\text{max}}} + c_4 \frac{(\text{Effort} - \text{VO}_{2\text{max}})^+}{\text{Effort} - \text{VO}_{2\text{max}}} - \text{kvo}_2 \text{VO}_2(t) \\ \text{VCO}_2(t)' &= c_5 \frac{(\text{Effort} - \text{VT}_1)^-}{\text{Effort} - \text{VT}_1} + c_6 \frac{(\text{Effort} - \text{VT}_1)^+}{\text{Effort} - \text{VT}_1} \frac{(\text{Effort} - \text{VT}_2)^-}{\text{Effort} - \text{VT}_2} \\ &\quad + c_7 \frac{(\text{Effort} - \text{VT}_2)^+}{\text{Effort} - \text{VT}_2} \frac{(\text{Effort} - \text{VO}_{2\text{max}})^-}{\text{Effort} - \text{VO}_{2\text{max}}} + c_8 \frac{(\text{Effort} - \text{VO}_{2\text{max}})^+}{\text{Effort} - \text{VO}_{2\text{max}}} - \text{kvco}_2 \text{VCO}_2(t) \end{aligned} \quad (1)$$

Changes in VO<sub>2</sub> and VCO<sub>2</sub> as a function of exercise intensity can then be calculated at each time point according to equations reported by Frayn (3), such that

$$\begin{aligned} CHO_{ox} &= 4.55 \text{ } VCO_2 - 3.21 \text{ } VO_2 \\ FAT_{ox} &= 1.67 \text{ } VO_2 - 1.67 \text{ } VCO_2 \end{aligned} \quad (2)$$

where CHO<sub>ox</sub> represents amount of oxidized carbohydrates in g/min, and FAT<sub>ox</sub> is the amount of oxidized fat in g/min. Simple arithmetic shows that from available CHO<sub>ox</sub> and FAT<sub>ox</sub> data, corresponding respiratory gases can be calculated as

$$\begin{aligned} VO_2 &= \frac{\frac{1}{4.55} CHO_{ox} + \frac{1}{1.67} FAT_{ox}}{1 - \frac{3.21}{4.55}} = 0.7463 \text{ } CHO_{ox} + 2.0332 \text{ } FAT_{ox} \\ VCO_2 &= VO_2 - \frac{1}{1.67} FAT_{ox} = 0.7463 \text{ } CHO_{ox} + 1.4344 \text{ } FAT_{ox} \end{aligned} \quad (3)$$

Table S1. Parameters for Model (1) needed to reproduce Figure 2.

| <i>Parameter</i> | <i>Description</i>                                                                    | <b>PA</b> | <b>MA</b> | <b>MtS</b> |
|------------------|---------------------------------------------------------------------------------------|-----------|-----------|------------|
| <i>c1</i>        | Rate of VO <sub>2</sub> increase when Effort < VT <sub>1</sub>                        | 0.12      | 0.11      | 0.1        |
| <i>c2</i>        | Rate of VO <sub>2</sub> increase when VT <sub>1</sub> < Effort < VT <sub>2</sub>      | 0.145     | 0.12      | 0.1175     |
| <i>c3</i>        | Rate of VO <sub>2</sub> increase when VT <sub>2</sub> < Effort < VO <sub>2</sub> max  | 0.15      | 0.16      | 0.191      |
| <i>c4</i>        | Rate of VO <sub>2</sub> increase when Effort > VO <sub>2</sub> max                    | -0.1      | -0.1      | -0.1       |
| <i>c5</i>        | Rate of VCO <sub>2</sub> increase when Effort < VT <sub>1</sub>                       | 0.152     | 0.1       | 0.05       |
| <i>c6</i>        | Rate of VCO <sub>2</sub> increase when VT <sub>1</sub> < Effort < VT <sub>2</sub>     | 0.207     | 0.118     | 0.116      |
| <i>c7</i>        | Rate of VCO <sub>2</sub> increase when VT <sub>2</sub> < Effort < VO <sub>2</sub> max | 0.25      | 0.1625    | 0.197      |
| <i>c8</i>        | Rate of VCO <sub>2</sub> increase when Effort > VO <sub>2</sub> max                   | -0.2      | -0.01     | -0.08      |
| <i>kvo2</i>      | Clearance of VO <sub>2</sub> in the absence of effort                                 | 0.0296    | 0.03      | 0.05       |
| <i>kvcO2</i>     | Clearance of VCO <sub>2</sub> in the absence of effort                                | 0.051     | 0.03      | 0.05       |
| <i>VT1</i>       | First ventilatory threshold                                                           | 220       | 130       | VT1        |
| <i>VT2</i>       | Second ventilatory threshold                                                          | 300       | 170       | VT2        |
| <i>VO2max</i>    | Threshold of maximum oxygen consumption                                               | 420       | 320       | VT3        |

It should be noted that the full data available for parametrizing this model were not available, particularly for MA and MtS participants, since it was collected at the level of intensity above VT<sub>1</sub>, and therefore oxygen and carbon dynamics could not be described for any data in that region. The key parameters that qualitatively affected model fits were those describing nutrient dynamics when Effort was above threshold VT<sub>1</sub>, namely, *c2* and *c3* for oxygen and *c6* and *c7* for carbon dioxide, as well as the threshold values VT<sub>1</sub>, VT<sub>2</sub> and VO<sub>2</sub>max. Even though in this case

values of  $c_1$  and  $c_5$  could not be estimated except for PA, they are included in the model for use when such data are available. It should also be noted that these are not necessarily unique values of parameters but instead these are the values that allow reproducing with sufficient fidelity data reported in (8), which is sufficient for the purposes of the questions addressed here.
